# Supplementary material
Source: publisher figshare collection journal article supplement (https://acs.figshare.com/ndownloader/files/3622305)
Supplement: Supplementary file 1 [file 3622305]

## **Supporting Information**

### **Biomonitoring of Perfluorinated Compounds in a Drop of Blood**

Pan Mao and Daojing Wang\*

Newomics Inc., Emeryville, California, United States

\*Correspondence should be addressed to:

Daojing Wang, Ph.D.

Newomics Inc.

5980 Horton Street, Suite 525

Emeryville, CA 94608

Phone: 510-879-7576

Email: wang@newomics.com

**Summary:** The supporting information contains a total of 5 pages (S-1 to S-5) including two figures (Figure S1 and Figure S2) and two tables (Table S1 and Table S2).

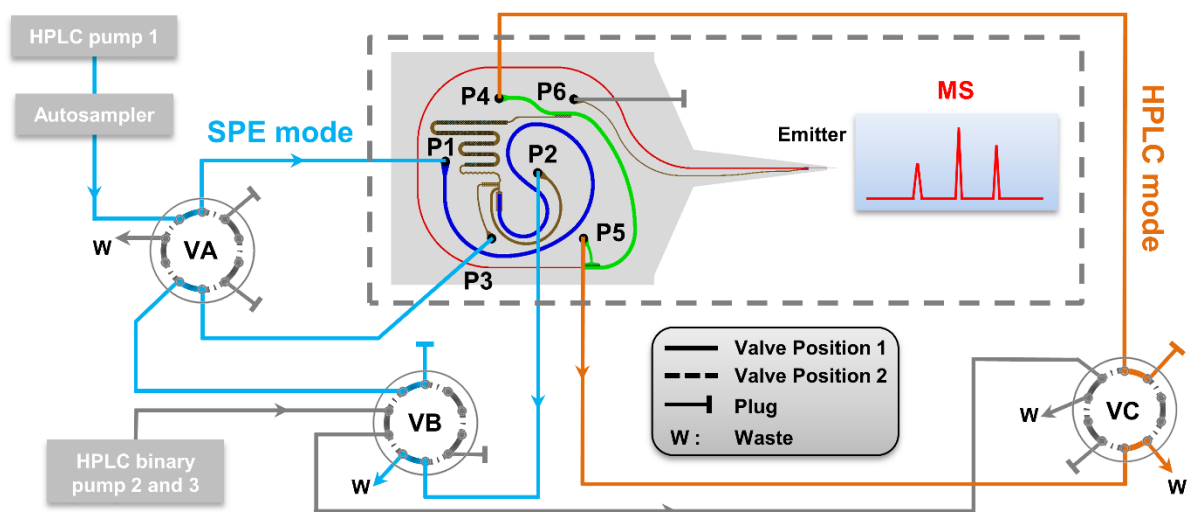

**Figure S1.** Operation of the SPE-LC-MS chip. System configuration and fluidic connection with external valves and pumps for chip operation. VA, VB, and VC are 2-position switching valves. Positions shown are those during SPE sample loading. P1-P6 are inlet/outlet ports.

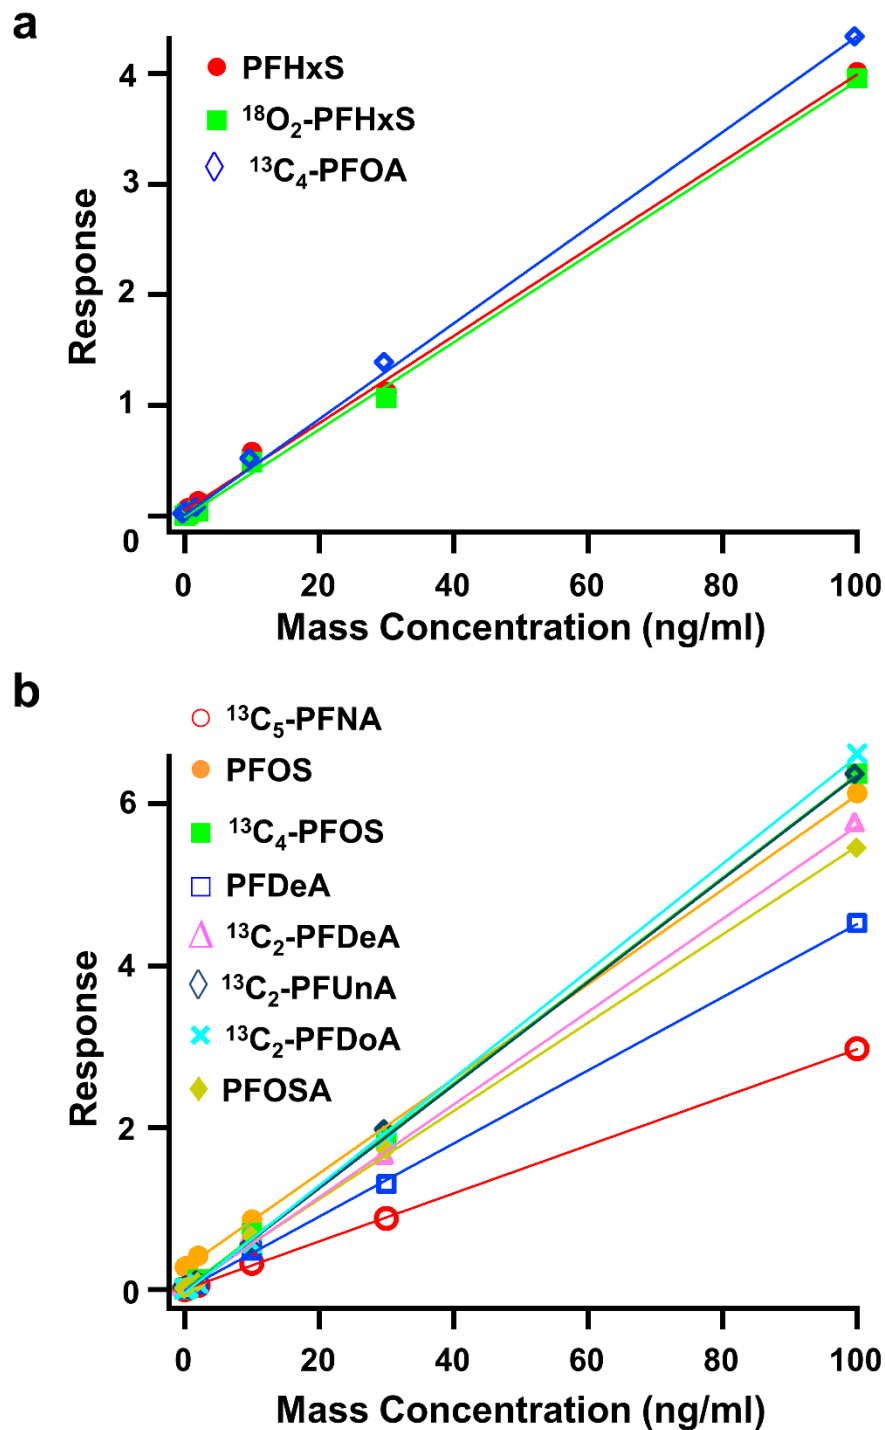

**Figure S2.** The calibration curves for PFC compounds. The response was obtained by calculating the ratios of peak areas between analytes and the internal standards over the concentration ranges of 0 - 100 ng/ml. (a) Response of PFHxS,  $^{18}\text{O}_2$ -PFHxS, and  $^{13}\text{C}_4$ -PFOA using  $^{13}\text{C}_8$ -PFOA as the internal standard. (b) Response of  $^{13}\text{C}_5$ -PFNA, PFOS,  $^{13}\text{C}_4$ -PFOS, PFDeA,  $^{13}\text{C}_2$ -PFDeA,  $^{13}\text{C}_2$ -PFUnA,  $^{13}\text{C}_2$ -PFDoA, and PFOSA using  $^{13}\text{C}_8$ -PFOS as the internal standard.

**Table S1. The workflow for on-chip and online SPE-LC-MS analysis**

| Steps | Method                                                                                                                                 | Fluidic and Valve Control |               |                    |               |               |
|-------|----------------------------------------------------------------------------------------------------------------------------------------|---------------------------|---------------|--------------------|---------------|---------------|
|       |                                                                                                                                        | P1                        | P2            | P3                 | P4            | P5            |
| 1     | Condition SPE column (20 $\mu$ l LC Solvent B, 10 $\mu$ l/min)                                                                         | Pump1<br>VA-1             | Waste<br>VB-1 | Plug<br>VA-1       | Plug<br>VC-1  | Waste<br>VC-1 |
| 2     | Equilibrate SPE column (20 $\mu$ l LC Solvent A, 10 $\mu$ l/min)                                                                       | Pump1<br>VA-1             | Waste<br>VB-1 | Plug<br>VA-1       | Plug<br>VC-1  | Waste<br>VC-1 |
| 3     | Load 4 $\mu$ l sample onto SPE column                                                                                                  | Pump1<br>VA-1             | Waste<br>VB-1 | Plug<br>VA-1       | Plug<br>VC-1  | Waste<br>VC-1 |
| 4     | Wash SPE column (20 $\mu$ l LC Solvent A, 10 $\mu$ l/min)                                                                              | Pump1<br>VA-1             | Waste<br>VB-1 | Plug<br>VA-1       | Plug<br>VC-1  | Waste<br>VC-1 |
| 5     | Elute SPE column and enrich eluents on trap column (20 $\mu$ l LC Solvent B, 1 $\mu$ l/min, mixed with LC Solvent A at 20 $\mu$ l/min) | Pump1<br>VA-1             | Plug<br>VB-2  | Pump2<br>VA-1,VB-2 | Plug<br>VC-1  | Waste<br>VC-1 |
| 6     | Run HPLC gradient elution and acquire LC-MS/MS data                                                                                    | Plug<br>VA-2              | Plug<br>VB-2  | Plug<br>VA-2,VB-2  | Pump3<br>VC-2 | Plug<br>VC-2  |

**Table S2. List of PFCs used in this study with their molecular and product ions in negative ESI-MS, along with collision energy, cone voltage, and linear range**

| Target Analytes                                                  | Molecular Weight | Observed Precursor Ion (m/z) | Observed Product Ion (m/z) | Collision Energy (eV) | Cone Voltage (V) | Linear Range (ng/ml) | R <sup>2</sup> Value |
|------------------------------------------------------------------|------------------|------------------------------|----------------------------|-----------------------|------------------|----------------------|----------------------|
| PFHpA* <sup>#</sup>                                              | 364.063          | 362.962                      | 318.962                    | 10                    | 25               | 0.05-100             | N/A                  |
| PFHxS <sup>&amp;</sup>                                           | 422.097          | 398.938                      | 98.988                     | 10                    | 25               | 0.05-100             | 0.9976               |
| <sup>18</sup> O <sub>2</sub> <sup>-</sup> PFHxS <sup>&amp;</sup> | 420.097          | 402.945                      | 102.945                    | 10                    | 25               | 0.05-100             | 0.9982               |
| PFOA* <sup>#</sup>                                               | 414.071          | 412.963                      | 368.961                    | 10                    | 25               | 0.05-100             | N/A                  |
| <sup>13</sup> C <sub>4</sub> -PFOA <sup>#</sup>                  | 418.040          | 416.973                      | 371.975                    | 10                    | 25               | 0.05-100             | 0.9998               |
| PFNA* <sup>#</sup>                                               | 464.078          | 462.978                      | 418.970                    | 10                    | 25               | 0.05-100             | N/A                  |
| <sup>13</sup> C <sub>5</sub> -PFNA <sup>#</sup>                  | 469.040          | 467.995                      | 422.990                    | 10                    | 25               | 0.05-100             | 0.9998               |
| PFOS <sup>&amp;</sup>                                            | 522.113          | 498.950                      | 98.988                     | 10                    | 25               | 0.05-100             | 0.9996               |
| <sup>13</sup> C <sub>4</sub> -PFOS <sup>&amp;</sup>              | 526.082          | 502.954                      | 98.988                     | 10                    | 25               | 0.05-100             | 0.9998               |
| PFDeA <sup>#</sup>                                               | 514.086          | 512.972                      | 468.980                    | 10                    | 25               | 0.05-100             | 0.9997               |
| <sup>13</sup> C <sub>2</sub> <sup>-</sup> PFDeA <sup>#</sup>     | 516.071          | 514.980                      | 469.979                    | 10                    | 25               | 0.05-100             | 0.9996               |
| <sup>13</sup> C <sub>2</sub> <sup>-</sup> PFUnA <sup>#</sup>     | 566.079          | 564.990                      | 519.990                    | 10                    | 25               | 0.05-100             | 0.9995               |
| <sup>13</sup> C <sub>2</sub> <sup>-</sup> PFDoA <sup>#</sup>     | 616.087          | 615.000                      | 570.000                    | 10                    | 25               | 0.05-100             | 0.9994               |
| PFOSA <sup>&amp;</sup>                                           | 499.146          | 497.953                      | 77.978                     | 10                    | 25               | 0.05-100             | 0.9993               |
| <b>Internal Standards</b>                                        |                  |                              |                            |                       |                  |                      |                      |
| <sup>13</sup> C <sub>8</sub> -PFOA <sup>#</sup>                  | 422.010          | 420.987                      | 375.987                    | 10                    | 25               |                      |                      |
| <sup>13</sup> C <sub>8</sub> -PFOS <sup>&amp;</sup>              | 530.052          | 506.974                      | 98.988                     | 10                    | 25               |                      |                      |

\* Those compounds had strong background signals in our HPLC system.

<sup>#</sup> Perfluoroalkylcarboxylic acids were quantified using their product ions.

<sup>&</sup> Perfluoroalkylsulfonates and perfluorooctanesulfonamides were quantified using their precursor ions.
